# Supplementary material for: Multimodal radiotherapy in recurrent refractory metastatic esophageal cancer
Source: Research Square preprint supplement (doi:10.21203/rs.3.rs-2546903/v1), 2023-02-08
Supplement: Supplementary file 1 [file c9c165f8eeba96026102de55.xlsx]

## Sheet: Sheet1
Table1 The related clinical study involved in recurrent and metastasis ESCC
Year	author	Study	R/M	Site	sample size	Surgery	RT	CT	PFS/DOR (month)	OS (month)	ORR(%)
1985-2003	zhen zhang,et al.	retrospective	M	/	178/843	/	30-50.4Gy	5-FU,IPT-11,DDP	/	17.4	/
2007	Lindeman Joerg,et al.	retrospective	M	chest wall	1	resection	/	/	18	/	/
2010-2016	Hui Yang,et al.	retrospective	M	bone/liver	444/720	/	RT	CT	/	8	/
2004-2006	Jianhua,Jin,et al.	retrospective	R/M	LN/liver/lung/bone	48	/	/	TP	3.1	5.9	0.271
2018-2021	Zhihao Liu,et al.	ORIENT-15	M	ESCC	327/659	/	/	Sintilimab+TP/PF	7.2	16.7	/
2014-2016	Jiang Huang,et al.	ESWN01	R/M	ESCC	61/123	/	/	IPT11+S1	3.8	7.1	24.6
2016-2018	Ken Kato,et al.	ATTRACTION-3	M	ESCC	94/194	/	/	Nivolumab+CT		10.9	/
2018-2020	Huiyan Luo,et al.	ESCORT1st	M	ESCC	298/596	/	/	Camrelizumab+CT	6.9	15.3	20.2
2017-2019	Y. Doki,et al.	CHECKMATE648	R/M	ESCC	277/970	/	/	Nivolumab+CT	5.8	13.2	/
2015-2017	Takashi Kojima,et al.	KEYNOTE181	M	ESCC	198/314	/	/	Perbrolizumab	2.2	8.2	/
2017-2019	JM Sun,et al.	KEYNOTE590	M	ESCC	274/373	/	/	Perbrolizumab+CT	6.3	12.4	/
ESCC, esophageal squamous cell carcinoma; R, relapsed; M,metastasis; LN,lympha node;RT, radiotherapy; CT, chemotherapy; IPT-11,Irinotecan; T,paclitaxel,DDP,cisplatin;F,fluorouracil
